# Supplementary material for: A heteropoly acid ionic crystal containing Cr as an active catalyst for dehydration of monosaccharides to produce 5-HMF in water
Source: Royal Society of Chemistry journal article supplement (doi:10.1039/c4cy01555j), 2015-01-01
Supplement: c4cy01555j1.pdf [file c4cy01555j1.pdf]

## Supporting Information

### Heteropoly acid ionic crystal containing Cr as active catalyst for dehydration of monosaccharides to produce 5-HMF in water

Xiaohu Yi<sup>a,b</sup>, Irina Delidovich<sup>b</sup>, Zhong Sun<sup>a</sup>, Shengtian Wang<sup>a</sup>, Xiaohong Wang<sup>a,\*</sup>,

Regina Palkovits<sup>b,\*</sup>

<sup>a</sup>Key Laboratory of Polyoxometalate, Science of Ministry of Education, Faculty of Chemistry, Northeast Normal University, Changchun, 130024, P. R. China. <sup>b</sup>Chair of Heterogeneous Catalysis and Chemical Technology, RWTH Aachen University, Worringerweg 1, 52074 Aachen, Germany.

Tel.: 0086-431-88930042; Fax: 0086-431-8509975; E-mail address: [wangxh665@nenu.edu.cn](mailto:wangxh665@nenu.edu.cn)

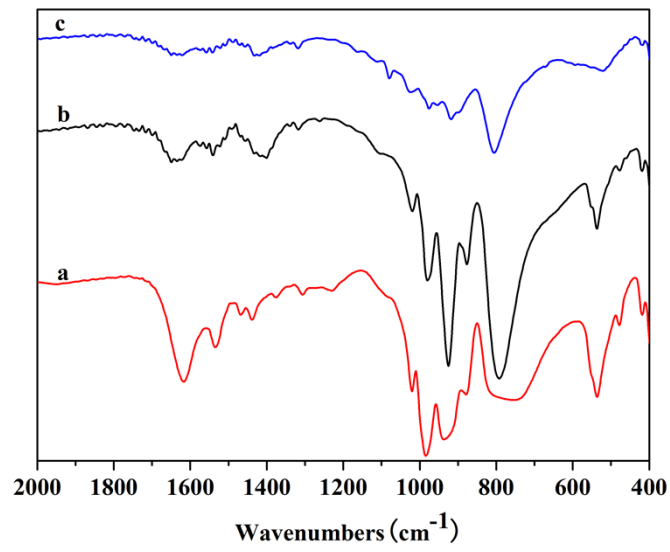

**Fig. S1.** The IR spectra of the Cs<sub>2</sub>Cr<sub>3</sub>SiW<sub>12</sub> after adsorption of fructose (a); parent material (b); recycled Cs<sub>2</sub>Cr<sub>3</sub>SiW<sub>12</sub> (c).

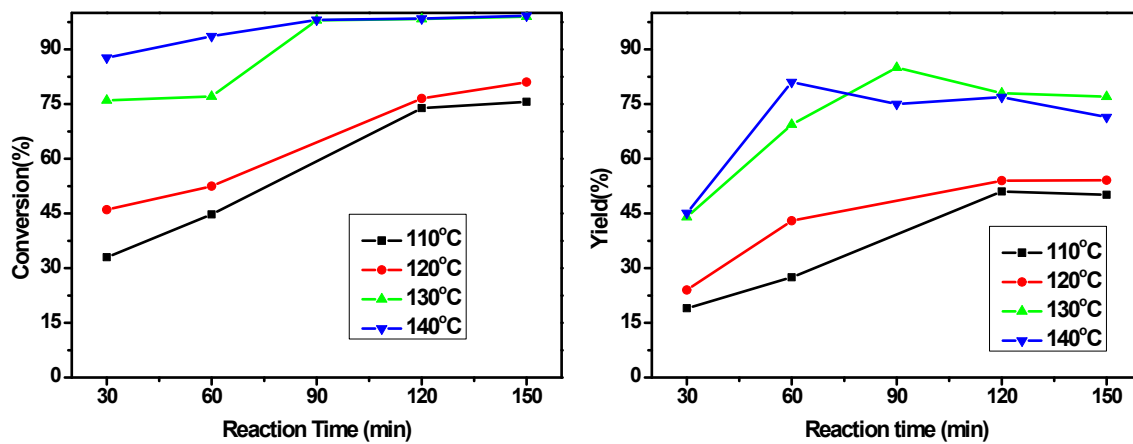

Fig. S2 The influence of temperature and reaction time on the conversion of fructose under the reaction conditions as: 0.3 g of fructose, 0.007 mmol of catalyst, 10 g of DMSO.
